# Supplementary material for: Triboelectric nanogenerator sensors for soft robotics aiming at digital twin applications
Source: PubMed Central journal article supplement (PMC7585441; doi:10.1038/s41467-020-19059-3), 2020-10-23
Supplement: 41467_2020_19059_MOESM3_ESM.pdf [file 41467_2020_19059_MOESM3_ESM.pdf]

## Description of Additional Supplementary Files

File name: Supplementary Movie 1

Description: Open-circuit stretching test for L-TENG sensor

File name: Supplementary Movie 2

Description: Open-circuit bending test when the L-TENG sensor is mounted on the index finger

File name: Supplementary Movie 3

Description: TENG-based glove used to control robotic hand

File name: Supplementary Movie 4

Description: Open-circuit bending test for the soft actuator integrated with L-TENG sensor

File name: Supplementary Movie 5

Description: Real-time gripped object prediction based on real-time signals and trained model

File name: Supplementary Movie 6

Description: Object recognition using machine learning technology and real-time projection in the digital twin.
